# Supplementary material
Source: PubMed Central journal article supplement (PMC3640767)
Supplement: NIHMS459552-supplement-216_2013_6908_MOESM1_ESM.pdf [file NIHMS459552-supplement-216_2013_6908_MOESM1_ESM.pdf]

## Chip-based nLC-TOF-MS is a highly stable technology for large-scale high-throughput analyses

L. Renee Ruhaak, Sandra L. Taylor, Suzanne Miyamoto, Karen Kelly, Gary S. Leiserowitz,

David Gandara, Carlito B. Lebrilla, Kyoungmi Kim

**Table S1.** Intra- and inter- day variability of nLC-chip-TOF-MS analysis of serum-derived N-glycans. Glycan compositions that were observed in all 51 analyses over 3 days are listed together with their calculated masses; intra-day CV's are calculated within a day and the overall inter-day CV across 3 days. CV's were calculated based on the log<sub>10</sub> transformed values

| Mass    | Composition                                  | Intra-Day CV (%) |       |       | Inter-Day CV (%) |
|---------|----------------------------------------------|------------------|-------|-------|------------------|
|         |                                              | Day 1            | Day 2 | Day 3 |                  |
| 910.328 | H <sub>3</sub> N <sub>2</sub>                | 2%               | 9%    | 1%    | 6%               |
| 1072.38 | H <sub>4</sub> N <sub>2</sub>                | 1%               | 5%    | 1%    | 3%               |
| 1113.41 | H <sub>3</sub> N <sub>3</sub>                | 3%               | 2%    | 5%    | 5%               |
| 1234.43 | H <sub>5</sub> N <sub>2</sub>                | 1%               | 2%    | 1%    | 2%               |
| 1259.47 | H <sub>3</sub> N <sub>3</sub> F <sub>1</sub> | 4%               | 2%    | 1%    | 4%               |
| 1275.46 | H <sub>4</sub> N <sub>3</sub>                | 3%               | 1%    | 1%    | 4%               |
| 1316.49 | H <sub>3</sub> N <sub>4</sub>                | 1%               | 3%    | 1%    | 2%               |
| 1396.49 | H <sub>6</sub> N <sub>2</sub>                | 1%               | 4%    | 1%    | 3%               |
| 1421.52 | H <sub>4</sub> N <sub>3</sub> F <sub>1</sub> | 2%               | 1%    | 1%    | 3%               |
| 1437.51 | H <sub>5</sub> N <sub>3</sub>                | 2%               | 6%    | 1%    | 4%               |
| 1462.54 | H <sub>3</sub> N <sub>4</sub> F <sub>1</sub> | 1%               | 1%    | 1%    | 2%               |
| 1478.54 | H <sub>4</sub> N <sub>4</sub>                | 2%               | 2%    | 1%    | 2%               |

|         |                                                             |    |    |    |    |
|---------|-------------------------------------------------------------|----|----|----|----|
| 1566.56 | H <sub>4</sub> N <sub>3</sub> S <sub>1</sub>                | 1% | 1% | 1% | 3% |
| 1599.57 | H <sub>6</sub> N <sub>3</sub>                               | 1% | 3% | 1% | 3% |
| 1624.6  | H <sub>4</sub> N <sub>4</sub> F <sub>1</sub>                | 1% | 2% | 1% | 2% |
| 1640.59 | H <sub>5</sub> N <sub>4</sub>                               | 1% | 1% | 1% | 2% |
| 1665.62 | H <sub>3</sub> N <sub>5</sub> F <sub>1</sub>                | 1% | 6% | 1% | 4% |
| 1681.62 | H <sub>4</sub> N <sub>5</sub>                               | 1% | 9% | 1% | 6% |
| 1712.61 | H <sub>4</sub> N <sub>3</sub> F <sub>1</sub> S <sub>1</sub> | 5% | 2% | 3% | 6% |
| 1720.59 | H <sub>8</sub> N <sub>2</sub>                               | 1% | 8% | 1% | 5% |
| 1728.61 | H <sub>5</sub> N <sub>3</sub> S <sub>1</sub>                | 1% | 1% | 1% | 3% |
| 1769.64 | H <sub>4</sub> N <sub>4</sub> S <sub>1</sub>                | 1% | 1% | 1% | 3% |
| 1786.65 | H <sub>5</sub> N <sub>4</sub> F <sub>1</sub>                | 3% | 1% | 1% | 3% |
| 1827.68 | H <sub>4</sub> N <sub>5</sub> F <sub>1</sub>                | 1% | 4% | 1% | 3% |
| 1843.67 | H <sub>5</sub> N <sub>5</sub>                               | 1% | 9% | 1% | 6% |
| 1882.65 | H <sub>9</sub> N <sub>2</sub>                               | 1% | 8% | 1% | 5% |
| 1890.66 | H <sub>6</sub> N <sub>3</sub> S <sub>1</sub>                | 2% | 1% | 2% | 4% |
| 1915.69 | H <sub>4</sub> N <sub>4</sub> F <sub>1</sub> S <sub>1</sub> | 2% | 3% | 3% | 5% |
| 1931.69 | H <sub>5</sub> N <sub>4</sub> S <sub>1</sub>                | 1% | 1% | 1% | 3% |
| 1972.71 | H <sub>4</sub> N <sub>5</sub> S <sub>1</sub>                | 2% | 4% | 2% | 4% |
| 1989.73 | H <sub>5</sub> N <sub>5</sub> F <sub>1</sub>                | 1% | 3% | 1% | 2% |
| 2005.72 | H <sub>6</sub> N <sub>5</sub>                               | 4% | 3% | 5% | 7% |
| 2044.7  | H <sub>10</sub> N <sub>2</sub>                              | 1% | 6% | 2% | 4% |
| 2077.75 | H <sub>5</sub> N <sub>4</sub> F <sub>1</sub> S <sub>1</sub> | 2% | 1% | 2% | 4% |
| 2093.74 | H <sub>6</sub> N <sub>4</sub> S <sub>1</sub>                | 2% | 1% | 3% | 4% |
| 2118.77 | H <sub>4</sub> N <sub>5</sub> F <sub>1</sub> S <sub>1</sub> | 2% | 1% | 2% | 3% |
| 2134.77 | H <sub>5</sub> N <sub>5</sub> S <sub>1</sub>                | 1% | 1% | 1% | 2% |
| 2222.78 | H <sub>5</sub> N <sub>4</sub> S <sub>2</sub>                | 1% | 2% | 1% | 4% |
| 2280.83 | H <sub>5</sub> N <sub>5</sub> F <sub>1</sub> S <sub>1</sub> | 1% | 1% | 1% | 2% |
| 2296.82 | H <sub>6</sub> N <sub>5</sub> S <sub>1</sub>                | 3% | 1% | 2% | 4% |
| 2368.84 | H <sub>5</sub> N <sub>4</sub> F <sub>1</sub> S <sub>2</sub> | 1% | 1% | 1% | 4% |
| 2384.84 | H <sub>6</sub> N <sub>4</sub> S <sub>2</sub>                | 4% | 1% | 3% | 5% |
| 2425.86 | H <sub>5</sub> N <sub>5</sub> S <sub>2</sub>                | 3% | 3% | 2% | 5% |
| 2442.88 | H <sub>6</sub> N <sub>5</sub> F <sub>1</sub> S <sub>1</sub> | 5% | 2% | 5% | 7% |
| 2571.92 | H <sub>5</sub> N <sub>5</sub> F <sub>1</sub> S <sub>2</sub> | 2% | 3% | 1% | 4% |
| 2587.92 | H <sub>6</sub> N <sub>5</sub> S <sub>2</sub>                | 2% | 1% | 1% | 4% |
| 2733.97 | H <sub>6</sub> N <sub>5</sub> F <sub>1</sub> S <sub>2</sub> | 2% | 1% | 1% | 5% |
| 2879.01 | H <sub>6</sub> N <sub>5</sub> S <sub>3</sub>                | 2% | 2% | 1% | 4% |
| 2953.05 | H <sub>7</sub> N <sub>6</sub> S <sub>2</sub>                | 2% | 2% | 3% | 6% |
| 3025.07 | H <sub>6</sub> N <sub>5</sub> F <sub>1</sub> S <sub>3</sub> | 1% | 3% | 1% | 5% |

**Table S2.** Intraclass correlations for each glycan for Day 1 vs. Day 2, Day 1 vs. Day 3 and Day 2 vs. Day 3

| <b>Glycan</b> | <b>Day1 vs. Day2</b> | <b>Day1 vs. Day3</b> | <b>Day2 vs. Day3</b> |
|---------------|----------------------|----------------------|----------------------|
| 2222.783      | 0.211                | 0.963                | 0.910                |
| 1931.688      | 0.032                | 0.933                | 0.964                |
| 2879.011      | 0.000                | 0.944                | 0.914                |
| 1624.597      | 0.177                | 0.947                | 0.833                |
| 2368.841      | 0.926                | 0.826                | 0.974                |
| 1462.544      | 0.000                | 0.886                | 0.778                |
| 2077.745      | 0.393                | 0.821                | 0.942                |
| 3025.068      | 0.026                | 0.970                | 0.900                |
| 1827.677      | 0.000                | 0.797                | 0.000                |
| 1786.65       | 0.235                | 0.740                | 0.954                |
| 1665.624      | 0.066                | 0.478                | 0.000                |
| 2587.915      | 0.053                | 0.913                | 0.961                |
| 2571.92       | 0.087                | 0.887                | 0.667                |
| 2280.825      | 0.434                | 0.900                | 0.895                |
| 1640.592      | 0.392                | 0.855                | 0.857                |
| 1566.555      | 0.772                | 0.926                | 0.962                |
| 1234.433      | 0.333                | 0.459                | 0.704                |
| 1989.729      | 0.000                | 0.186                | 0.150                |
| 1882.645      | 0.087                | 0.858                | 0.000                |
| 1396.486      | 0.000                | 0.000                | 0.000                |
| 2733.973      | 0.000                | 0.961                | 0.976                |
| 1478.539      | 0.025                | 0.573                | 0.616                |
| 1720.592      | 0.068                | 0.647                | 0.000                |
| 1681.619      | 0.059                | 0.000                | 0.070                |
| 1769.635      | 0.921                | 0.750                | 0.950                |
| 1316.487      | 0.000                | 0.898                | 0.404                |
| 2296.82       | 0.377                | 0.802                | 0.962                |
| 1728.608      | 0.572                | 0.803                | 0.913                |
| 1072.381      | 0.079                | 0.842                | 0.000                |
| 2134.767      | 0.692                | 0.725                | 0.880                |
| 910.3278      | 0.000                | 0.109                | 0.077                |
| 1259.465      | 0.510                | 0.173                | 0.877                |
| 1275.46       | 0.587                | 0.527                | 0.946                |
| 1421.518      | 0.594                | 0.868                | 0.955                |
| 1843.672      | 0.000                | 0.000                | 0.000                |
| 2118.772      | 0.630                | 0.595                | 0.868                |
| 1113.407      | 0.045                | 0.615                | 0.732                |
| 1890.661      | 0.458                | 0.793                | 0.902                |
| 2953.047      | 0.172                | 0.924                | 0.947                |
| 1915.693      | 0.000                | 0.871                | 0.839                |
| 2425.862      | 0.038                | 0.816                | 0.888                |
| 1599.566      | 0.377                | 0.000                | 0.347                |

|          |       |       |       |
|----------|-------|-------|-------|
| 1712.613 | 0.763 | 0.186 | 0.917 |
| 1437.513 | 0.124 | 0.833 | 0.000 |
| 2384.836 | 0.378 | 0.743 | 0.927 |
| 2093.74  | 0.683 | 0.650 | 0.902 |
| 1972.714 | 0.300 | 0.277 | 0.034 |
| 2044.697 | 0.000 | 0.461 | 0.000 |
| 2442.878 | 0.135 | 0.676 | 0.848 |
| 2005.724 | 0.213 | 0.696 | 0.848 |

---

**Fig. S1.** MS spectra for the two glycan structures  $H_4N_4F_1$  and  $H_5N_4S_1$  at  $m/z$  813.31 and  $m/z$  966.85 and 8.2 min and 9.5 min, respectively. MS spectra are shown for six runs on the three different days

$H_4N_4F_1$  at  $m/z$  813.31 and 8.2 min.

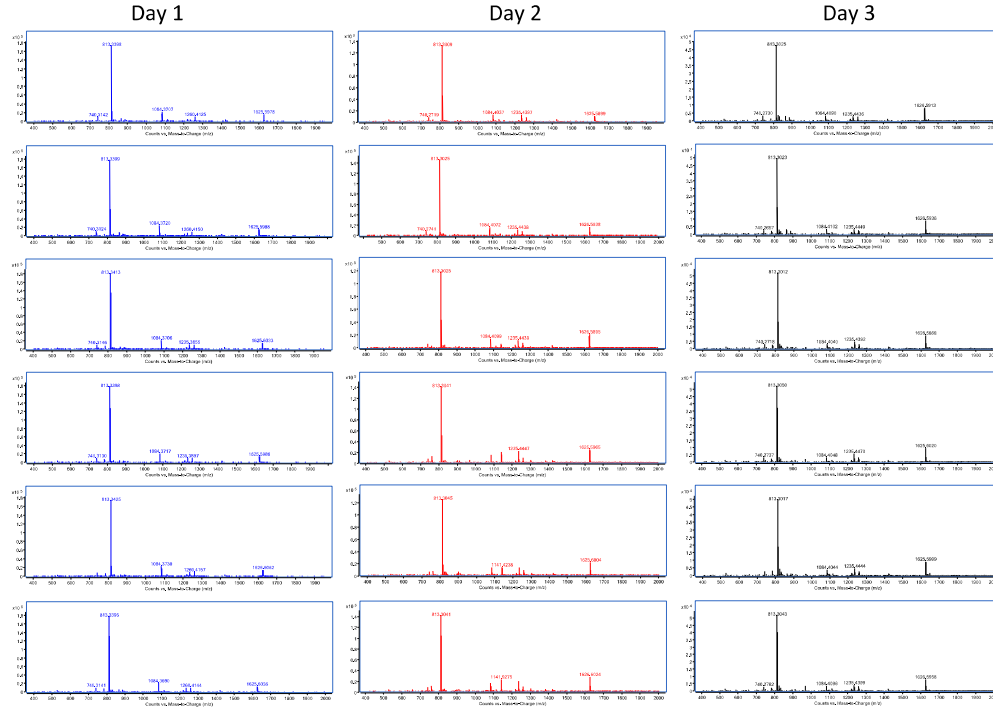

$H_5N_4S_1$  at  $m/z$  966.85 and 9.5 min.

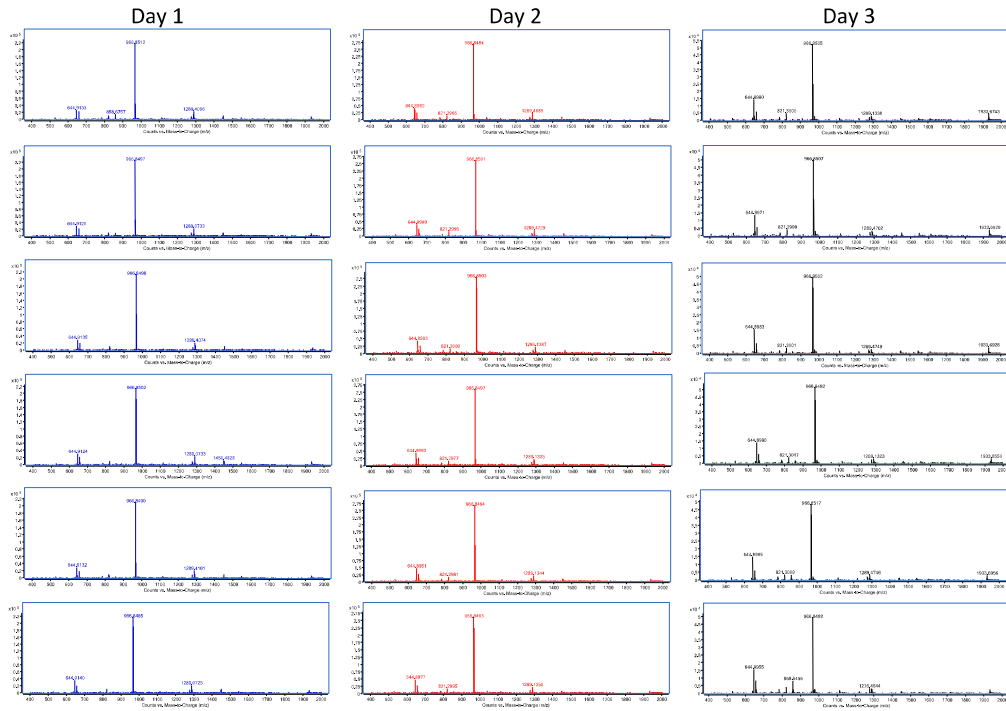

## Materials and methods

### *Study design*

N-glycan analysis from one standard serum sample was performed repeatedly with intermittent blanks on three non-consecutive days. Twelve duplicate analyses were performed on Day 1, twenty-two analyses were performed on Day 2 and seventeen analyses were performed on Day 3; the analyses on days 1 and 2 were performed on a previously used chip with approximately 300 hours of operation, while for the analyses on Day 3 a new analytical chip was used.

### *N-glycan sample preparation*

To evaluate the stability of the nLC-PGC-chip-TOF-MS instrument for profiling of N-glycans from serum, N-glycans were released from the proteins in 50  $\mu$ l of serum standard (Sigma-aldrich, St.Louis, MO) as previously described [1]. Briefly, proteins were denatured using 100mM dithiothreitol (DTT, Promega, Madison, WI), and subsequent heating. Two  $\mu$ L of PNGaseF (New England Biolabs, Ipswich, MA) were added to the samples, and enzymatic glycan release was performed in a CEM (Matthews, NC) microwave at 20W for 10 min [1]. Deglycosylated proteins were precipitated using 400  $\mu$ L of ice-cold ethanol. After centrifugation, the supernatant containing the glycans was brought to dryness *in vacuo*.

N-linked glycans released by PNGaseF were purified using graphitized carbon SPE (Grace, Deerfield, IL) [2-4]. Briefly, cartridges were conditioned using 4 mL of 80% ACN containing 0.05% TFA (EMD chemicals, Gibbstown, NJ), followed by 4 mL of

water containing 0.05% TFA. Glycan samples were reconstituted in 500  $\mu$ L of water and subsequently loaded onto the cartridges. Cartridges were washed using 3 x 4 mL of water and N-glycans were eluted using 4 mL of 40% ACN containing 0.05% TFA. Samples were dried *in vacuo* prior to analysis.

#### *nHPLC-chip-TOF-MS analysis*

N-glycans were analyzed using an Agilent (Santa Clara, CA) 6200 series nanoHPLC-chip-TOF-MS, consisting of an autosampler, which was maintained at 8°C, a capillary loading pump, a nanopump, HPLC-chip-MS interface and an Agilent 6210 Time Of Flight mass spectrometer. The chip (Glycan Chip II, Agilent) contained a 9 x 0.075 mm i.d. enrichment column coupled to a 43 x 0.075 mm i.d. analytical column; both packed with 5  $\mu$ m porous graphitized carbon (PGC). N-glycan samples were reconstituted in 45  $\mu$ L of water and diluted 1:5 with water prior to analysis; 1  $\mu$ L of sample was used for injection. Upon injection, the sample was loaded onto the enrichment column using 3% ACN containing 0.1% formic acid (FA, Fluka, St. Louis, MO). Then the analytical column was switched in-line so that the nano-pump delivered a gradient of 3% ACN with 0.5% FA (solvent A) to 90% ACN with 0.5% FA (solvent B). The mass spectrometer was operated in positive ionization mode.

#### *Data analysis*

Data analysis was performed using Masshunter<sup>®</sup> qualitative analysis (version B.03.01, Agilent) and Microsoft<sup>®</sup> Excel<sup>®</sup> for Mac 2011 (version 14.1.3, Microsoft), according to Hua et al. [4] with modifications. Data was loaded into Masshunter<sup>®</sup> qualitative analysis, and glycan features were identified and integrated using the Molecular Feature Extractor

algorithm. First, signals above a signal to noise threshold of 5.0 were considered. Then, signals were deconvoluted using a tolerance of  $0.0025\ m/z \pm 10\ \text{ppm}$ . The resulting deconvoluted masses were subsequently annotated using a retrosynthetic theoretical glycan library which was previously developed [5] and contained 331 possible N-glycan compositions. A 15 ppm mass error was allowed. Glycan compositions, retention times and peak area were exported to csv-format for further evaluation.

### *Statistics*

For statistical evaluation, the integral values were  $\log_{10}$  transformed to reduce the influence of extreme values. Patterns in total glycan area and the proportion of non-detectables over time were evaluated graphically as was the relationship with the proportion of non-detectables and area values. Coefficients of variance (CVs) were calculated to assess inter- and intra-day variability.

### References

1. Kronewitter SR, de Leoz ML, Peacock KS, McBride KR, An HJ, Miyamoto S, Leiserowitz GS, Lebrilla CB (2010) Human serum processing and analysis methods for rapid and reproducible N-glycan mass profiling. *J Proteome Res* 9 (10):4952-4959
2. Packer NH, Lawson MA, Jardine DR, Redmond JW (1998) A general approach to desalting oligosaccharides released from glycoproteins. *GlycoconjJ* 15 (8):737-747
3. Chu CS, Ninonuevo MR, Clowers BH, Perkins PD, An HJ, Yin H, Killeen K, Miyamoto S, Grimm R, Lebrilla CB (2009) Profile of native N-linked glycan structures from human serum using high performance liquid chromatography on a microfluidic chip and time-of-flight mass spectrometry. *Proteomics* 9 (7):1939-1951
4. Hua S, An HJ, Ozcan S, Ro GS, Soares S, DeVere-White R, Lebrilla CB (2011) Comprehensive native glycan profiling with isomer separation and quantitation for the discovery of cancer biomarkers. *Analyst* 136 (18):3663-3671
5. Kronewitter SR, An HJ, de Leoz ML, Lebrilla CB, Miyamoto S, Leiserowitz GS (2009) The development of retrosynthetic glycan libraries to profile and classify the human serum N-linked glycome. *Proteomics* 9 (11):2986-2994
